# Supplementary material
Source: PubMed Central journal article supplement (PMC10230172)
Supplement: BLOODA_ADV-2022-008666-mmc1.pdf [file BLOODA_ADV-2022-008666-mmc1.pdf]

Uncoupling of platelet granule release and integrin activation suggests GPIIb/IIIa as  
therapeutic target in COVID-19

Lukas J. Weiss,<sup>1,2</sup> Maria Drayss,<sup>1,2</sup> Georgi Manukjan,<sup>1</sup> Maximilian Zeitlhöfler,<sup>1</sup> Judith Kleiss,<sup>1</sup> Mathis Weigel,<sup>1</sup> Johannes Herrmann,<sup>3</sup> Kristina Mott,<sup>1</sup> Sarah Beck,<sup>4</sup> Philipp Burkard,<sup>1</sup> Thiên-Trí Lâm,<sup>5</sup> Karina Althaus,<sup>6</sup> Tamam Bakchoul,<sup>6</sup> Stefan Frantz,<sup>2</sup> Patrick Meybohm,<sup>3</sup> Bernhard Nieswandt,<sup>1,4</sup> Dirk Weismann\*<sup>2</sup> and Harald Schulze\*<sup>1</sup>

<sup>1</sup>Institute of Experimental Biomedicine, University Hospital Würzburg, Germany

<sup>2</sup>Department of Internal Medicine I, University Hospital Würzburg, Germany

<sup>3</sup>Department of Anaesthesiology, Intensive Care, Emergency and Pain Medicine University Hospital Würzburg, Germany

<sup>4</sup>Rudolf Virchow Center, University of Würzburg, Germany

<sup>5</sup>Institute for Hygiene and Microbiology, University of Würzburg, Germany

<sup>6</sup>Centre for Clinical Transfusion Medicine, University Hospital of Tübingen, Germany

\* DW and HS contributed equally

## Supplemental data

Correspondence:

Harald Schulze, PhD

University Hospital Würzburg

Institute for Experimental Biomedicine, Chair I,

Josef-Schneider-Str. 2/D15

97080 Würzburg

Germany

Phone: +49-931-201-48329

Fax: +49-931-201-648363

harald.schulze@uni-wuerzburg.de

## **Additional methods**

### *Flow cytometry and data analysis*

Flow cytometry and mepacrine assay were performed as described recently.<sup>1,2</sup> Geometric mean fluorescence intensity (GeoMFI) values were calculated using FlowJo V.10 (BD, Franklin Lakes, NJ, USA) and were normalized to allow a site by site comparison among separately recruited cohorts (Supplemental Fig. 2). Clustering analyses were calculated using the FlowSOM Vers.3.0.18 plugin for Flow-Jo after the event count has been adjusted using DownSample Vers. 3.3.1.<sup>3</sup>

### *Lumiaggrometry*

Lumiaggrometry with platelet rich plasma (PRP) [platelet count >150/nl] was performed in a CHRONO-LOG device (Leiden, Netherlands) according to manufacturer's guidelines. Briefly, calibration was performed using a 2nM ATP standard. 50 µl of Chrono-lume luciferase reagent (both CHRONO-LOG) was added to 450 µl of PRP [final concentration: 166 U/ml] in prewarmed incubation wells and co-incubated for 3 minutes. Light transmission and the luminescence signal were recorded after agonist addition for six minutes at 37°C under stirring conditions (1000 rpm). Results were calculated using the Aggro-Link 8 software.

### *Point-of-care devices: PFA-200 and thrombelastometry*

For patients with a platelet count of at least 150/nl, the in vitro-thrombus formation was assessed in 800 µl of whole blood, using the PFA-200 (Siemens Healthineers, Erlangen, Germany). The assay was performed according to manufacturer's guidelines using the collagen/ADP- and collagen/epinephrine-coated cartridges (Siemens Healthineers). We measured INTEM, EXTEM, or FIBTEM (Werfen, Barcelona, Spain) in whole blood by Rotational Thromboelastometry for 60 minutes.

### Whole mount electron microscopy

For electron microscopy, carbon 200 mesh grids (Plano, Wetzlar, Germany) were coated with PRP for 60 seconds prior to dilution with distilled water. Grids were dried with filter paper and gently waved in the air to remove residual fluid.<sup>4</sup> Imaging was performed without additional fixation or staining using a JEOL-JEM 1400 microscope (JEOL Ltd., Tokyo, Japan). 20 representative images were acquired.  $\delta$ -granule number was determined by two blinded investigators. Data was analyzed using GraphPad Prism (Version 9.2.0, GraphPad Software, San Diego, CA USA). BioRender.com was used for figure illustration.

### *Flow Chamber*

Cover slides were coated with 50  $\mu$ g/ml Horm collagen (Takeda, Linz, Austria) for 12 hours at 37°C followed by 100 pM human recombinant tissue factor (Dade Innovin / Siemens Healthineers, Erlangen, Germany) for 1 h and blocked with 1% bovine serum albumin (BSA) for 1h. A parallel plate Maastricht flow chamber was rinsed with flow buffer (10 mM HEPES, 136 mM NaCl, 2.7 mM KCl, BSA 0.36%, glucose 0.1%, 2mM MgCl<sub>2</sub>; pH 7.45). After preincubation for 5 minutes at 37°C with anti-GPIIb $\beta$ -Alexa-Fluor 647 (p0p1, in house generated<sup>5</sup> and Alexa-Fluor 488-conjugated fibrinogen (Thermofisher Scientific Waltham MA, USA; final concentration: 3.125 ng/ $\mu$ L), citrate-anticoagulated whole blood was recalcified at the beginning of perfusion applying either arterial ( $\gamma$ =1000 s<sup>-1</sup>; t=6 min) or venous shear rates ( $\gamma$ =200 s<sup>-1</sup>, t=12 min). Images were acquired using a Leica DMI 6000 B fluorescence microscope (63x objective, NA 1.3, Leica DFC 360x camera, Wetzlar, Germany). After washing with Ca<sup>2+</sup> enriched flow buffer (3.2 mM MgCl<sub>2</sub>; 6.2 mM CaCl<sub>2</sub>) for 1 minute (arterial shear) or 5 minutes (venous shear) five to ten representative images were obtained. Fixation for further

imaging was performed with 4% paraformaldehyde for 30 minutes. PBS washed slides were mounted with Fluoroshield (Sigma-Aldrich, St. Louis, MO, USA) and analyzed using a laser-scanning confocal microscope (Leica TCS SP8, Wetzlar, Germany) with a 63x oil objective, NA1.4 and LAS X software for image documentation. Image processing was performed with ImageJ (Version 2.0.0-rc-69/1.52p, NIH, MD, USA). For GPIIb/IIIa blockade whole blood was additionally incubated with different concentrations of eptifibatid (Sigma Aldrich, St Louis, MO, USA) or tirofiban (Sigma Aldrich, St Louis, MO, USA) for 20 minutes prior to perfusion. Brightfield images were assessed visually for thrombus morphology (morphological score), contraction (contraction score) and thickness (multilayer score) by two blinded investigators. Surface area coverage (% SAC) of fibrin(ogen) and platelets and thrombus intensity were measured in immunofluorescence images using semi-automated ImageJ / Fiji-scripts.<sup>6</sup>

### Statistical analyses

The statistical tests to address significance are specified in the respective figure legends.

## References

1. Weiss LJ, Manukjan G, Pflug A, et al. Acquired platelet GPVI receptor dysfunction in critically ill patients with sepsis. *Blood*. 2021;137(22):3105-3115.
2. Manukjan G, Eilenberger J, Andres O, Schambeck C, Eber S, Schulze H. Functional Classification of Paediatric Patients with Non-syndromic Delta-Storage Pool Deficiency. *Hamostaseologie*. 2019;39(4):383-391.
3. Van Gassen S, Callebaut B, Van Helden MJ, et al. FlowSOM: Using self-organizing maps for visualization and interpretation of cytometry data. *Cytometry A*. 2015;87(7):636-645.
4. White JG. Electron-dense chains and clusters in platelets from patients with storage pool-deficiency disorders. *J Thromb Haemost*. 2003;1(1):74-79.
5. Bergmeier W, Rackebrandt K, Schröder W, Zirngibl H, Nieswandt B. Structural and functional characterization of the mouse von Willebrand factor receptor GPIb-IX with novel monoclonal antibodies. *Blood*. 2000;95(3):886-893.
6. Schindelin J, Arganda-Carreras I, Frise E, et al. Fiji: an open-source platform for biological-image analysis. *Nat Methods*. 2012;9(7):676-682.

**Supplementary Table 1: Blood parameters from healthy controls**

| Anticoagulant                          | Healthy ctrl                         |                                   |
|----------------------------------------|--------------------------------------|-----------------------------------|
|                                        | Citrate<br>(n=35)<br>61 measurements | EDTA<br>(n=22)<br>25 measurements |
| Age, median (IQR)                      | 25 (23-30)                           |                                   |
| <b>Laboratory values, median (IQR)</b> |                                      |                                   |
| PLT                                    | 203 (185-246)                        | 266 (224-296)                     |
| RBC                                    | 4.42 (4.10-4.64)                     | 4.80 (4.45-5.14)                  |
| WBC                                    | 5.6 (4.6-6.2)                        | 6.1 (4.9-6.7)                     |
| Hb                                     | 13 (12.2-13.7)                       | 14.1 (13.2-14.8)                  |
| Hct                                    | 38 (35-40)                           | 42 (39-43)                        |

**Abbreviations:**

IQR: Interquartile range

RBC: red blood cell count

Hb: Hemoglobin

PLT: Platelet

WBC: White blood cell count

Hct: Hematocrit

Of 35 healthy donors, 61 measurements have been performed at different time points. Blood cell counts were determined with a Sysmex KX21N for all measurements (middle column). For 22 out of these 35 controls additional EDTA-based blood cell counts were available with a total of 25 measurements (right column). The data from this column reflect the patient data compiled in Table 1.

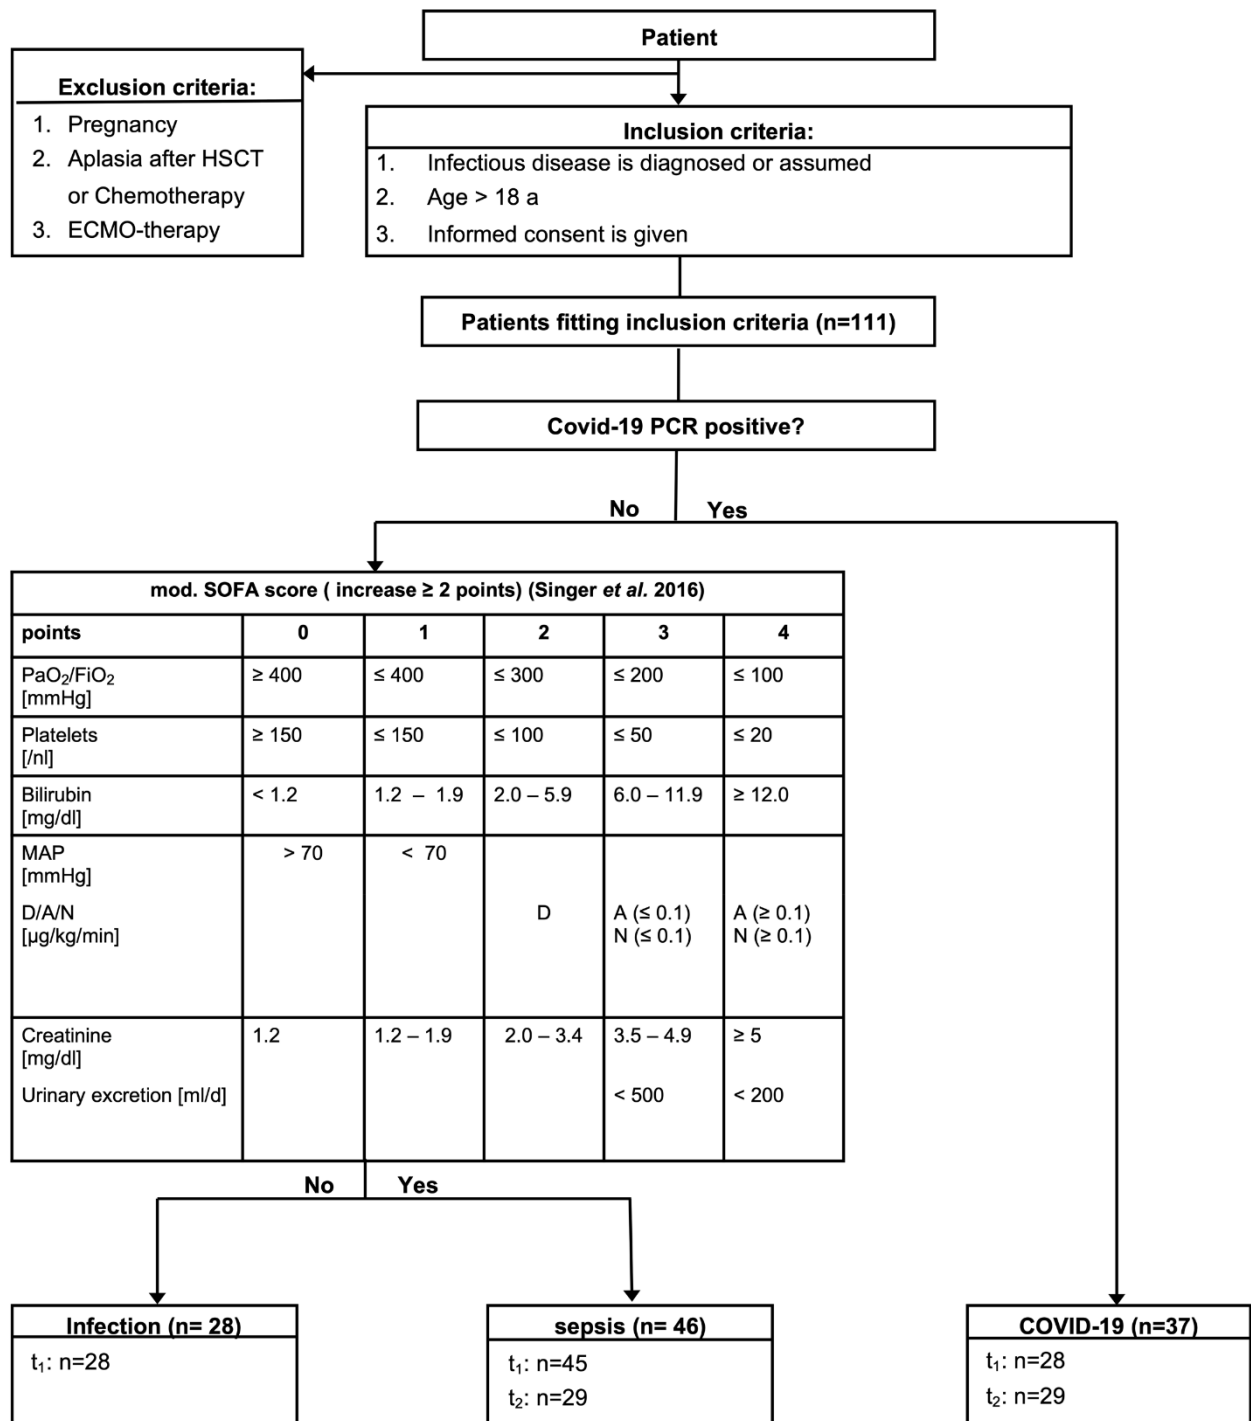

HSCT: Hematopoietic stem cell transplantation  
MAP: Mean arterial pressure  
D/A/N: Dobutamine, adrenaline, nordadrenaline

**Supplemental Figure 1: Inclusion-algorithm for patients**

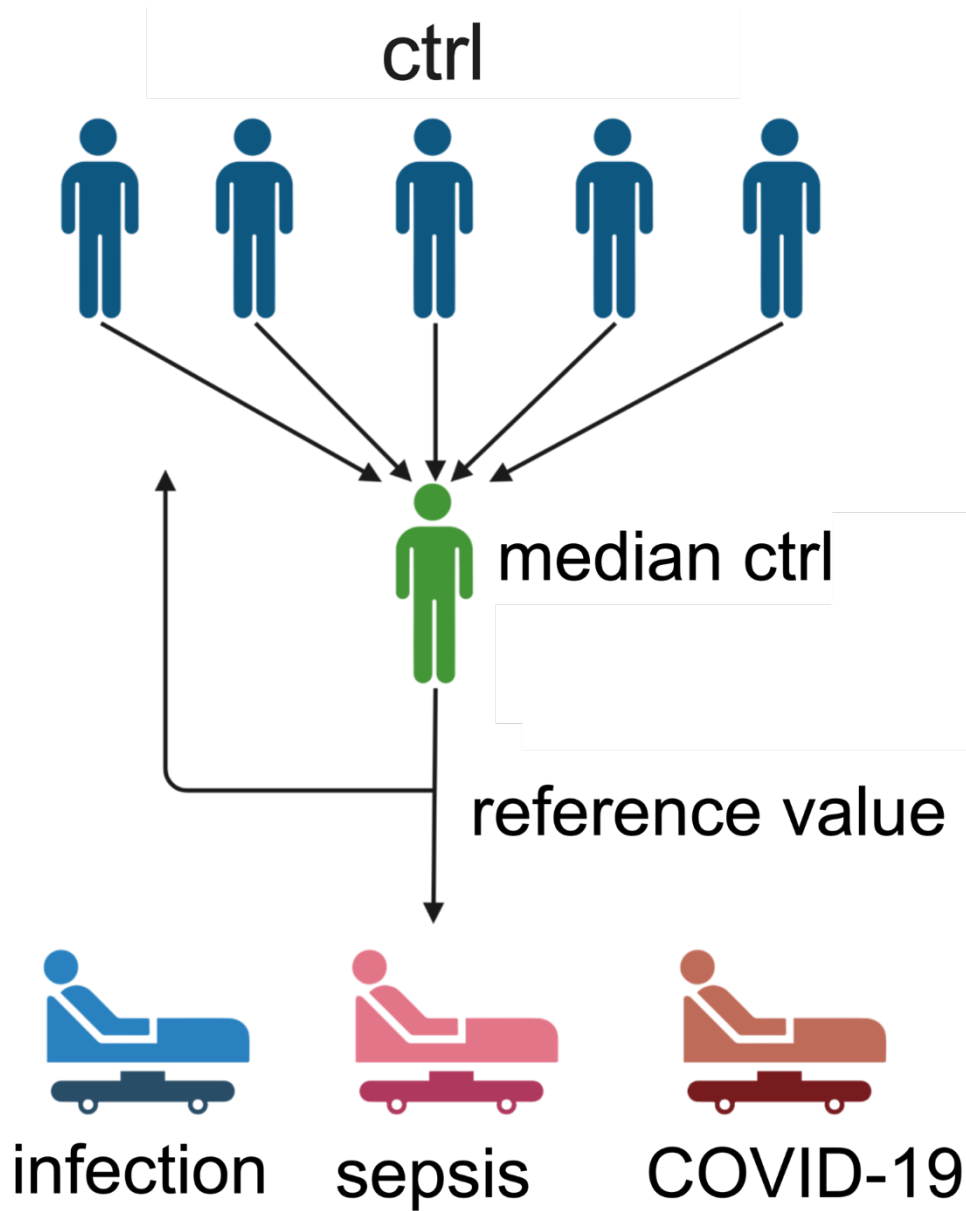

**Supplemental Figure 2: Normalization scheme:** median healthy control GeoMFI values were defined and used as reference for patient cohorts.



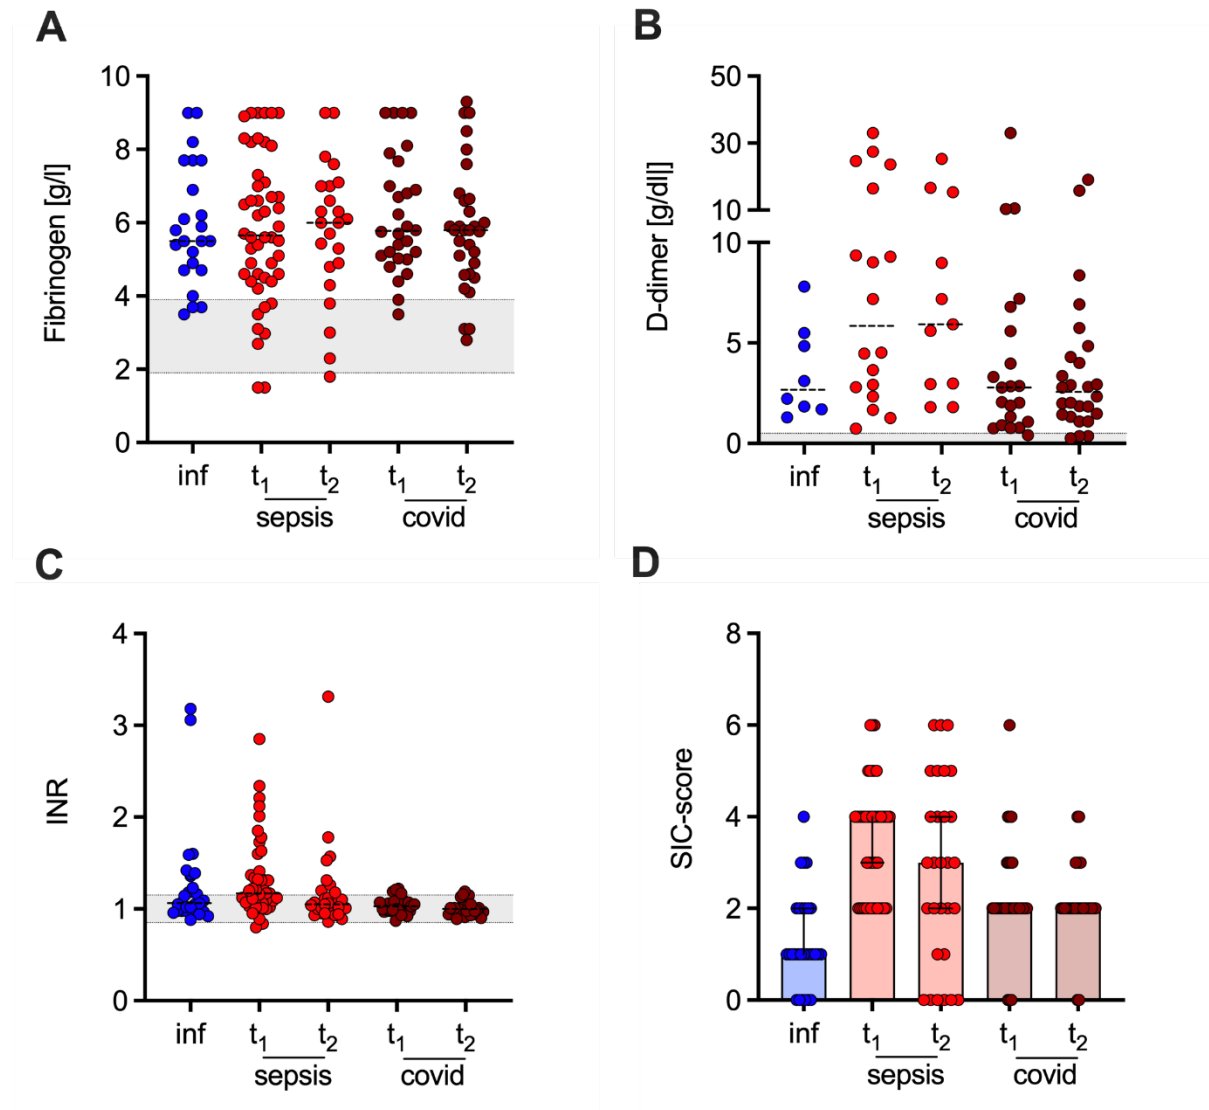

### Supplemental Figure 3: Acute phase reaction and altered coagulation

(A) Fibrinogen-level, (B) D-dimers, (C) international normalized ratio and (D) sepsis-induced coagulopathy (SIC) score of patients with infection (inf), sepsis or COVID-19 are displayed at: t<sub>1</sub>: hospital/ICU admission day; t<sub>2</sub>: day 4 to 7. Reference ranges are indicated by dashed lines. Graphs A-C display median and D median  $\pm$  95% CI.

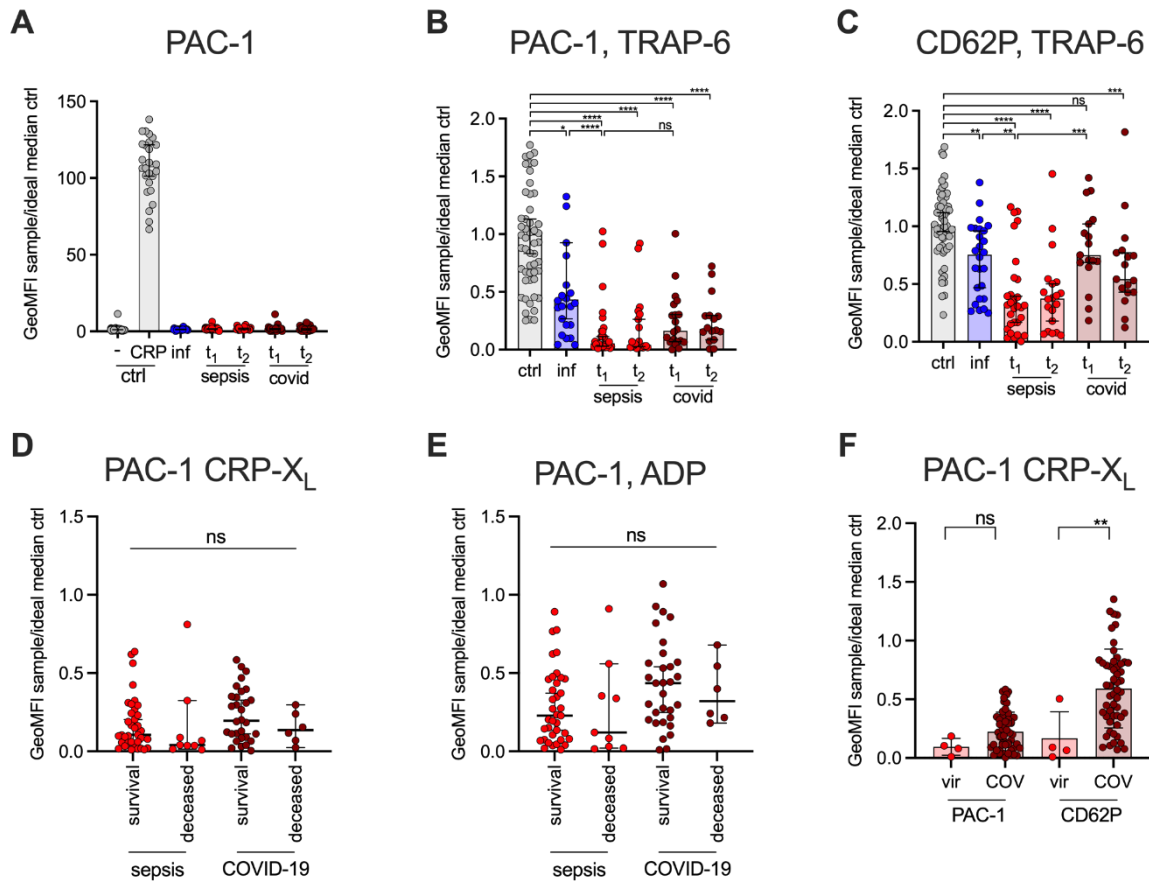

### Supplemental Figure 4: Hyporeactive platelets in sepsis and COVID-19

Characteristics of healthy controls (ctrl), patients with infection (inf), sepsis or COVID-19 are displayed at: t<sub>1</sub>: hospital/ICU admission day; t<sub>2</sub>: day 4 to 7. **(A)** Normalized GPIIb/IIIa activation under resting conditions and upon stimulation of ctrls with CRP-X<sub>L</sub> (CRP). **(B)** GPIIb/IIIa activation and **(C)** CD62P surface exposition upon TRAP-6 stimulation [5 μM] were determined by flow cytometry. GPIIb/IIIa activation upon stimulation with **(D)** CRP-X<sub>L</sub> or **(E)** ADP of last available measurement of surviving and deceasing patients. **(F)** GPIIb/IIIa activation and CD62P surface exposition upon stimulation with CRP-X<sub>L</sub> of patients suffering from viral infection in the sepsis cohort vs. COVID-19 patients. All graphs show median ± 95%CI. **(B-C)** Differences were analyzed using Kruskal-Wallis test or **(D-F)** Mann-Whitney test ns: nonsignificant. \*p<0.05; \*\*p<0.01; \*\*\*p<0.001; \*\*\*\*p<0.0001.

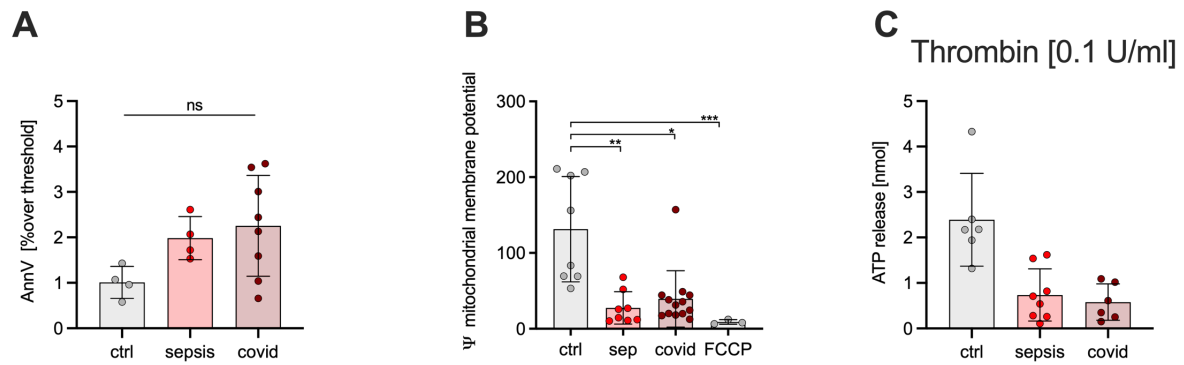

### Supplemental Figure 5: Procoagulant platelets in sepsis and COVID-19

Characteristics of healthy controls (ctrl), patients with infection (inf), sepsis or COVID-19 are displayed at:  $t_1$ : hospital/ICU admission day;  $t_2$ : day 4 to 7. **(A)** Phosphatidylserine surface exposition was measured by Annexin V binding. **(B)** Mitochondrial membrane potential was assessed using TMRE **(C)** ATP release was measured by lumiaggregometry in PRP upon thrombin stimulation [0.1 U/ml] (platelet count >150/nl). All graphs show median  $\pm$  95% CI. Differences were analyzed using the Kruskal-Wallis test. ns: nonsignificant; \* $p < 0.05$ ; \*\* $p < 0.01$ ; \*\*\* $p < 0.001$ .

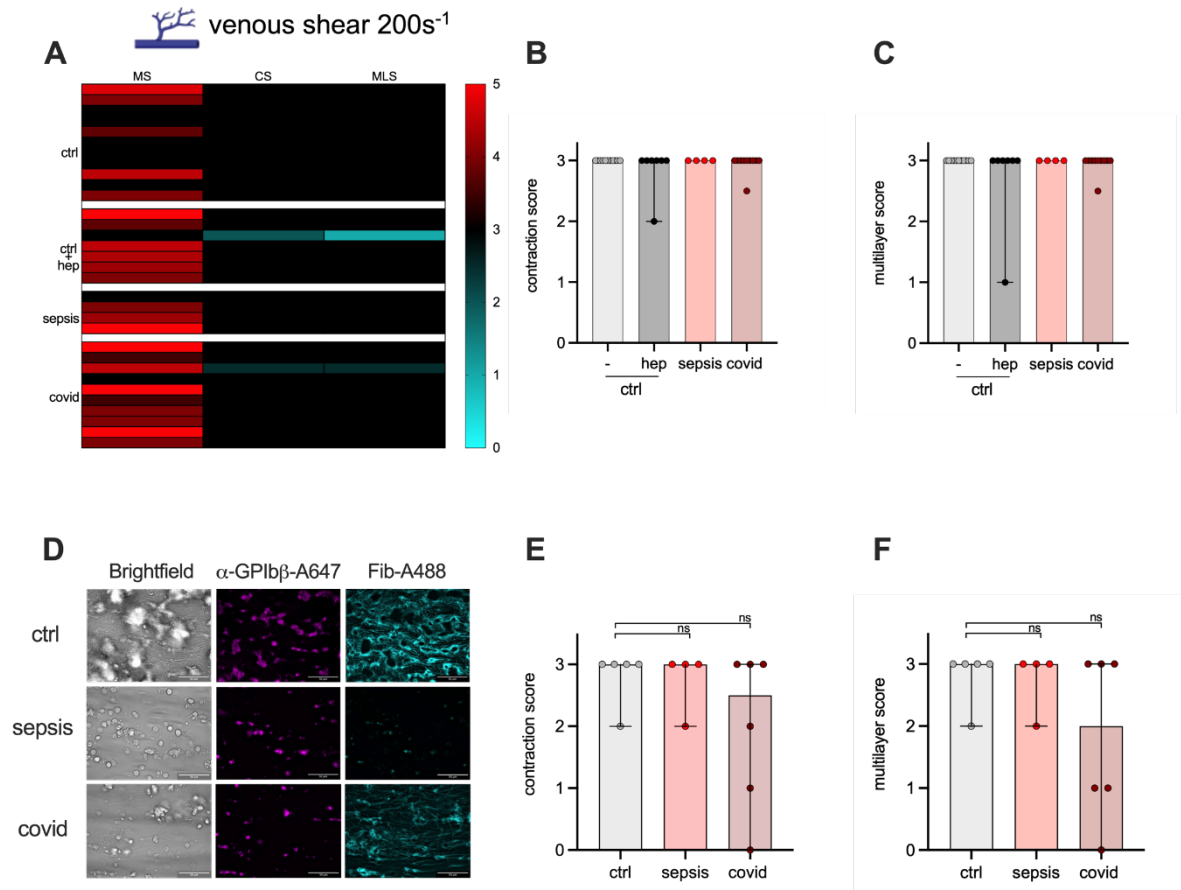

### Supplemental Figure 6: Robust thrombus formation in COVID-19 and sepsis patients under venous shear

Thrombus formation was assessed under venous shear ( $200\text{ s}^{-1}$ ) in recalcified whole blood on **(A-C)** collagen and tissue factor or **(D-F)** only collagen coated slides. **(B,E)** Contraction score and **(C,F)** multilayer score calculated in a two investigator blinded approach. **(A)** Quantitative imaging of morphological score, contraction score and multilayer score in a heat map for each individual ctrl and patient. Representative figures are displayed in **D**. **B, C, E, F** show median  $\pm$  95%CI. Differences were analyzed using Kruskal-Wallis test. ns: nonsignificant. \* $p < 0.05$ ; \*\* $p < 0.01$ ; \*\*\* $p < 0.001$ ; \*\*\*\* $p < 0.0001$ .

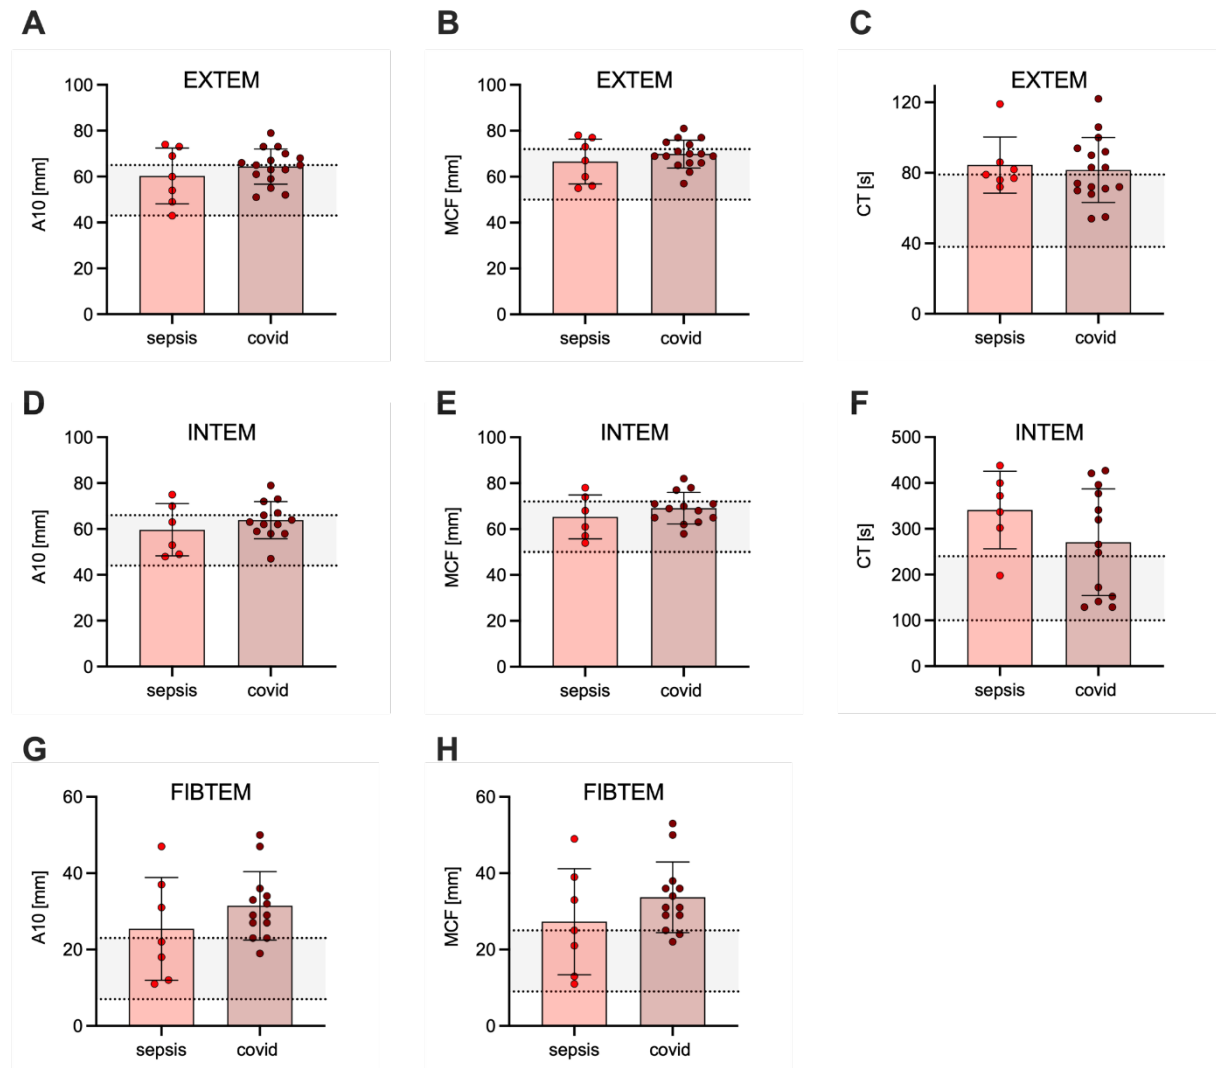

### Supplemental Figure 7: Hypercoagulability during critical infection

(A-C) EXTEM, (D-F) INTEM and (G-H) FIBTEM were determined by Rotational Thromboelastometry analysis in patients assessing (A,D,G) amplitude at 10 mins (A10) (B,E,H) maximum clot firmness (MCF) or (C,F) clotting time (CT). Reference ranges are indicated by dashed lines.



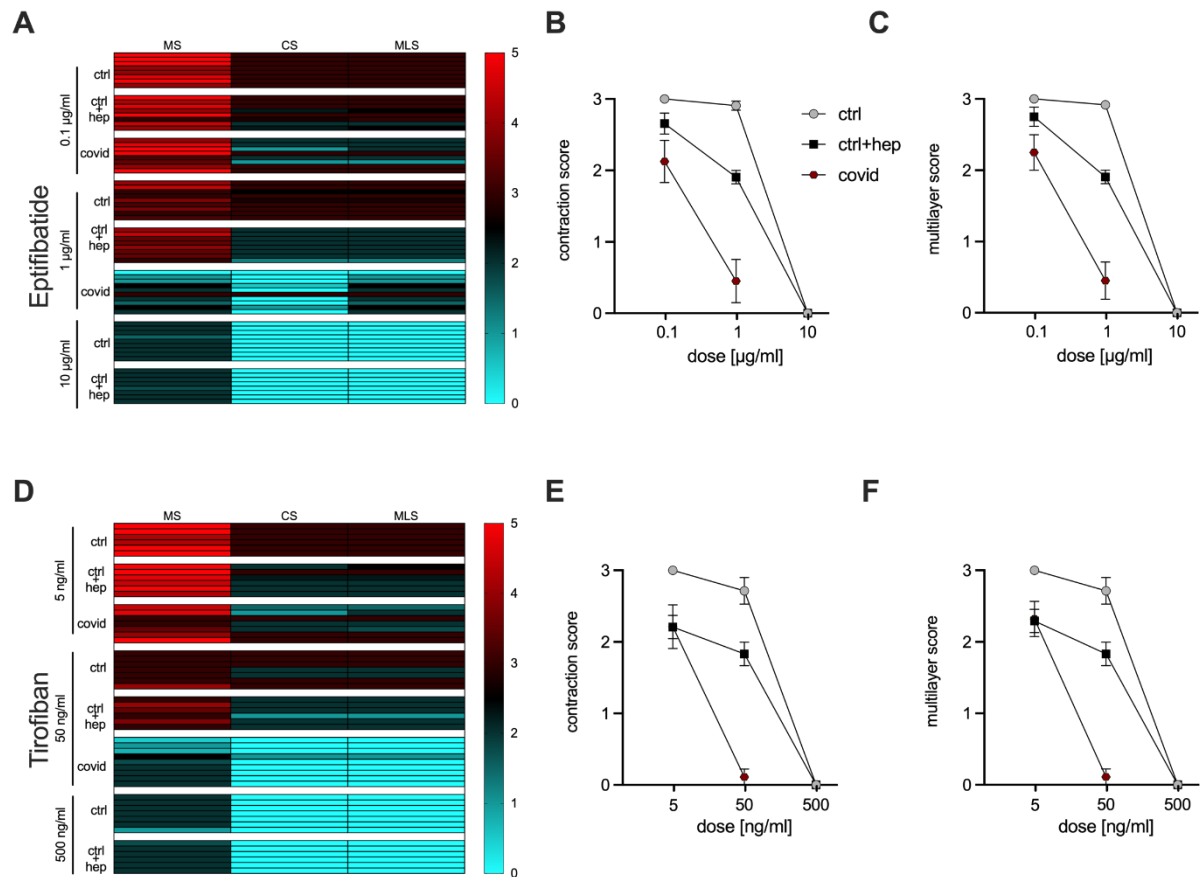

### Supplemental Figure 9: Low dose GPIIb/IIIa blockade prevents thrombus formation in COVID-19

Thrombus formation on collagen/TF was assessed under arterial shear ( $1000 \text{ s}^{-1}$ ) in recalcified whole blood after preincubation with (A-C) eptifibatide or (D-F) tirofiban at the indicated concentrations. (B,E) Contraction score and (C,F) multilayer score were calculated in a two investigator blinded approach. (A,D) Quantitative imaging of morphological score, contraction score and multilayer score in a heat map for each individual ctrl and patient. B, C, E, F show mean  $\pm$  SEM. Differences were analyzed using Kruskal-Wallis test. ns: nonsignificant. \* $p < 0.05$ ; \*\* $p < 0.01$ ; \*\*\* $p < 0.001$ ; \*\*\*\* $p < 0.0001$ .

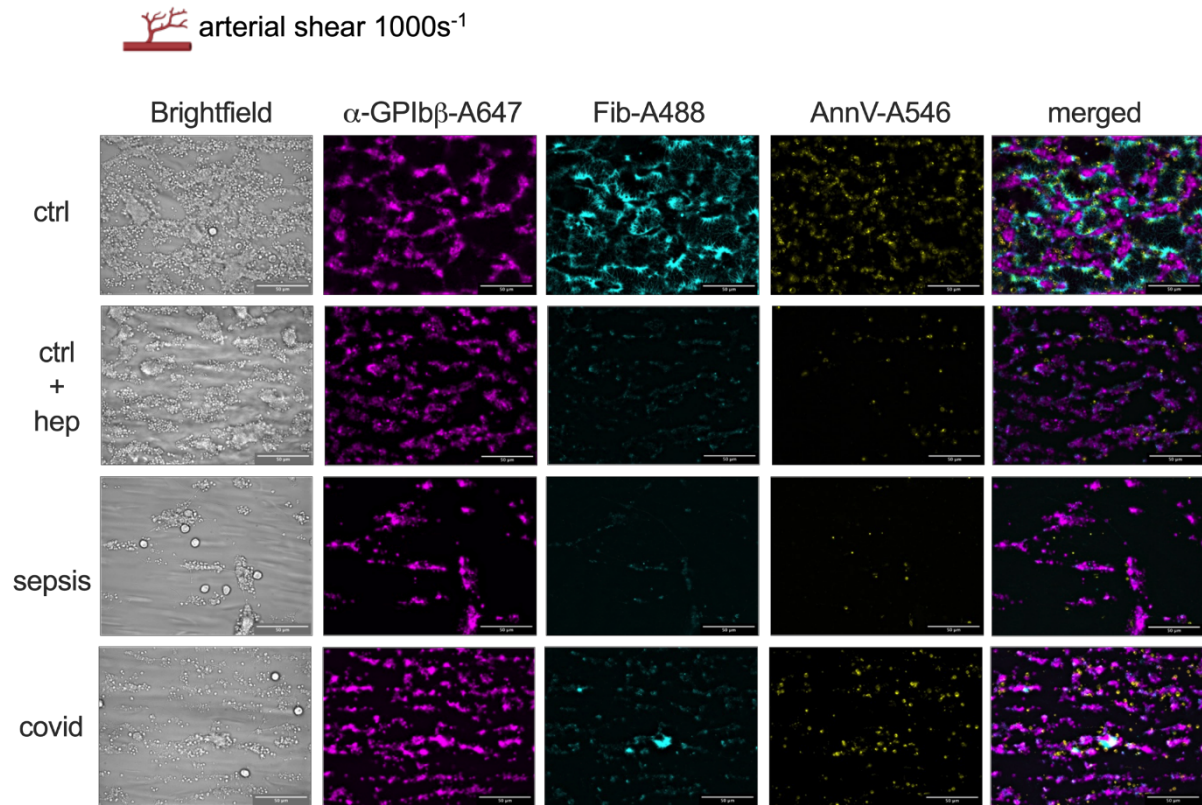

**Supplemental Figure 10: Annexin V-positive events in the coagulation flow chamber model**

Thrombus formation on collagen/TF was assessed under arterial shear ( $1000\text{ s}^{-1}$ ) in recalcified whole blood. Samples were stained for platelets ( $\alpha$ -GPIIb $\beta$ -Alexa647: magenta), fibrin(ogen) (Alexa488: cyan) and phosphatidylserine (Annexin V-Alexa546: yellow [ $0.5\text{ }\mu\text{g/ml}$ ]).



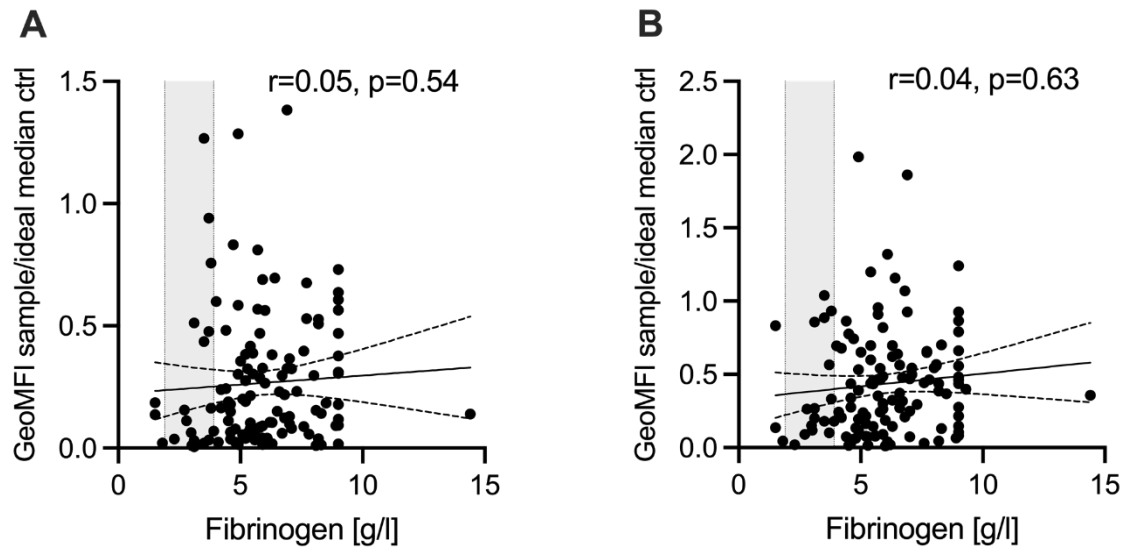

**Supplemental Figure 11: No correlation of plasma fibrinogen levels with PAC-1 binding to platelets.** Plasma fibrinogen levels vs. GPIIb/IIIa activation (PAC-1-binding) upon stimulation with **(A)** CRP-X<sub>L</sub> or **(B)** ADP.
